# Supplementary material for: Corticosteroids for sore throat: a clinical practice guideline
Source: PubMed Central journal article supplement — BMJ. 2017 Sep 20;358:j4090. doi: 10.1136/bmj.j4090 (PMC6284245; doi:10.1136/bmj.j4090), 2017-09-20
Supplement: aerb039975.w2.pdf [file aerb039975.w2.pdf]

## **Appendix 2: Full list of authors' declarations of interests**

### **Pre-screening**

All panel members were pre-screened for conflicts of interest prior to the guideline process that resulted in the *BMJ* Rapid Recommendations. The pre-screening was performed by the RapidRecs Executive team from the non-profit organisation MAGIC ([www.magicproject.org](http://www.magicproject.org)) with support and approval from at least two unconflicted *BMJ* editors. No financial conflicts of interest were allowed (specifically, no financial ties to pharmaceutical companies with any stake in steroids or antibiotics) and intellectual and professional conflicts of interest were managed appropriately (see appendix 4: Methods for *BMJ* Rapid Recommendations). Panel members could not have a conflict for the past three years and do not anticipate a conflict arising in the foreseeable future, which we defined as at least one year.

We excluded one potential panel member who had expressed interest because they did not meet the *BMJ* Rapid Recommendation standards for conflicts of interest.

### **Disclosures**

Financial disclosures: No panel members had any financial conflicts of interest to disclose related to this clinical question.

Professional disclosures: The majority of the panel members routinely see patients with sore throat. The department which Jako Burgers is affiliated, Dutch College of General Practitioners, published a guideline on acute sore throat in 2015. Ann van Bruel recently published an opinion article in the *British Journal of General Practice* on pharmacy-based testing for strep A in patients with sore throat. No other professional conflicts of interest to disclose.

Intellectual disclosures: Behnam Sadeghirad, Reed Siemieniuk, Per Vandvik, Lyubov Lytvyn, Thomas Agoritsas, and Romina Brignardello-Petersen, participated in the writing of the complementary systematic review that formed the evidence base for this guideline. Bert Artgeerts, Reed Siemieniuk, Lyubov Lytvyn, Behnam Sadeghirad, and Romina Brignardello-Petersen contributed to the systematic review of values and preferences in the appendix. Reed Siemieniuk, Arnaud Merglen, Thomas Agoritsas, Per Vandvik, Lyubov Lytvyn, and Gordon Guyatt are members of the GRADE Working Group: *BMJ* Rapid Recommendations adheres to GRADE methods. No panel member had any other intellectual conflict to disclose.
