# Supplementary material for: Corticosteroids for sore throat: a clinical practice guideline
Source: PubMed Central journal article supplement — BMJ. 2017 Sep 20;358:j4090. doi: 10.1136/bmj.j4090 (PMC6284245; doi:10.1136/bmj.j4090), 2017-09-20
Supplement: aerb039975.wi.pdf [file aerb039975.wi.pdf]

Contextual information, which will only be provided when viewer interacts with these elements (by hovering the mouse or touching the screen)

Static screenshot of the fully-expanded graphic

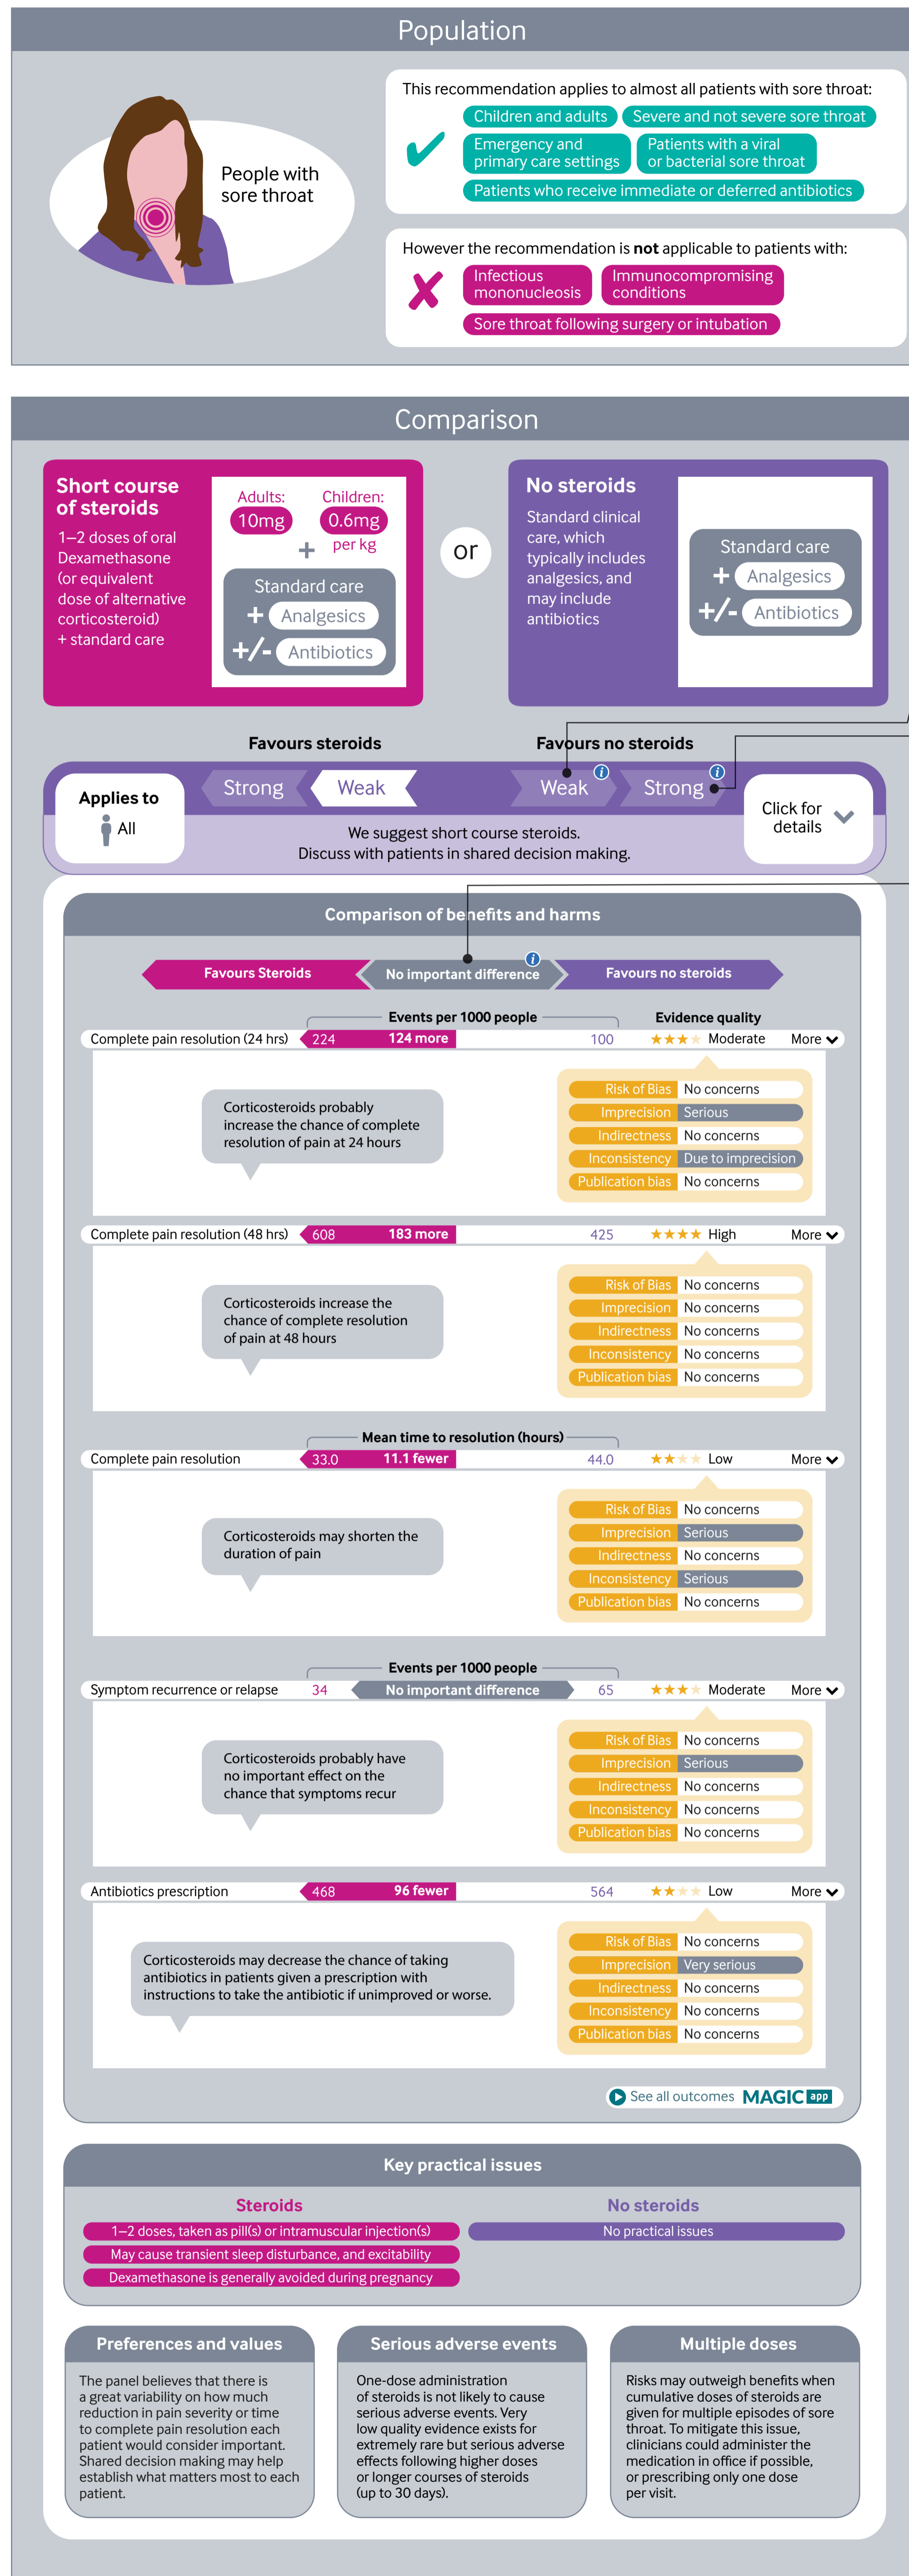

This section is hidden until the "more" button is clicked

This section is hidden until the "more" button is clicked

This section is hidden until the "more" button is clicked

This section is hidden until the "more" button is clicked

This section is hidden until the "more" button is clicked

This section is hidden initially

Benefits outweigh harms for the majority, but not for everyone. The majority of patients would likely want this option

Benefits outweigh harms for almost everyone. All or nearly all informed patients would likely want this option

The panel found that this difference was not important for most patients, because the intervention effects were negligible and/or very imprecise (such as statistically not significant)

© 2017 BMJ Publishing group Ltd.

Disclaimer: This infographic is not a clinical decision aid. This information is provided without any representations, conditions or warranties that it is accurate or up to date. BMJ and its licensors assume no responsibility for any aspect of treatment administered with the aid of this information. Any reliance placed on this information is strictly at the user's own risk. For the full disclaimer wording see BMJ's terms and conditions: <http://www.bmj.com/company/legal-information/>

Find recommendations, evidence summaries and consultation decision aids for use in your practice **MAGIC app**

thebmj See an interactive version of this graphic online <http://bit.ly/BMjrrSST>
